# Supplementary material
Source: HighWire-hosted journal article supplement (https://cmaj.ca/highwire/filestream/58322/field_highwire_adjunct_files/0/effect-schull-1-at_online_only_.pdf)
Supplement: effect-schull-1-at_online_only_.pdf [file effect-schull-1-at_online_only_.pdf]

**Appendix 1: Effect of restrictions to control an outbreak of severe acute respiratory syndrome (SARS) on hospital admissions and emergency department visits**

| Variable                                                                               | Affected region (Greater Toronto Area)        |                                    |      |                               |      |                                               | Comparison regions in Ontario (London, Ottawa) |               |                               |               |      |               |
|----------------------------------------------------------------------------------------|-----------------------------------------------|------------------------------------|------|-------------------------------|------|-----------------------------------------------|------------------------------------------------|---------------|-------------------------------|---------------|------|---------------|
|                                                                                        | Monthly pre-SARS rate per 1000, mean (95% CI) | Adjusted relative change* (95% CI) |      |                               |      | Monthly pre-SARS rate per 1000, mean (95% CI) | Adjusted relative change* (95% CI)             |               |                               |               |      |               |
|                                                                                        |                                               | Early SARS restriction period†     |      | Late SARS restriction period‡ |      |                                               | Early SARS restriction period†                 |               | Late SARS restriction period‡ |               |      |               |
| <b>Hospital admissions</b>                                                             |                                               |                                    |      |                               |      |                                               |                                                |               |                               |               |      |               |
| Overall                                                                                | 5.83                                          | (5.44-6.22)                        | 0.88 | (0.85-0.91)††                 | 0.89 | (0.85-0.92)††                                 | 6.60                                           | (6.19-7.01)   | 0.96                          | (0.93-0.98)   | 0.99 | (0.96-1.02)   |
| Medical§                                                                               | 4.83                                          | (4.50-5.16)                        | 0.89 | (0.86-0.92)††                 | 0.90 | (0.86-0.94)††                                 | 5.54                                           | (5.18-5.91)   | 0.96                          | (0.93-0.99)   | 0.99 | (0.96-1.02)   |
| High-volume surgical                                                                   |                                               |                                    |      |                               |      |                                               |                                                |               |                               |               |      |               |
| Urgent¶                                                                                | 0.35                                          | (0.33-0.38)                        | 1.00 | (0.95-1.06)                   | 0.96 | (0.91-1.02)                                   | 0.37                                           | (0.35-0.39)   | 0.98                          | (0.89-1.06)   | 1.04 | (0.95-1.13)   |
| Elective**                                                                             | 0.81                                          | (0.75-0.88)                        | 0.78 | (0.74-0.82)                   | 0.85 | (0.80-0.89)                                   | 0.89                                           | (0.82-0.95)   | 0.92                          | (0.86-0.97)   | 0.92 | (0.86-0.98)   |
| <b>Cause specific</b>                                                                  |                                               |                                    |      |                               |      |                                               |                                                |               |                               |               |      |               |
| Delivery                                                                               | 4.26                                          | (3.96-4.57)                        | 0.98 | (0.94-1.03)                   | 0.97 | (0.92-1.02)                                   | 3.92                                           | (3.71-4.14)   | 0.98                          | (0.94-1.03)   | 0.98 | (0.93-1.02)   |
| Acute myocardial infarction                                                            | 0.18                                          | (0.16-0.19)                        | 0.85 | (0.78-0.91)††                 | 0.94 | (0.87-1.02)                                   | 0.22                                           | (0.20-0.24)   | 0.94                          | (0.84-1.03)   | 0.81 | (0.72-0.90)†† |
| Pulmonary embolism                                                                     | 0.017                                         | (0.015-0.019)                      | 0.86 | (0.67-1.11)                   | 0.75 | (0.57-0.98)††                                 | 0.021                                          | (0.017-0.024) | 0.86                          | (0.60-1.13)   | 0.96 | (0.65-1.27)   |
| Gastrointestinal bleed                                                                 | 0.043                                         | (0.039-0.047)                      | 0.79 | (0.68-0.91)††                 | 0.98 | (0.85-1.13)                                   | 0.051                                          | (0.046-0.056) | 1.03                          | (0.81-1.24)   | 0.83 | (0.64-1.02)   |
| Vascular emergencies (ruptured abdominal aortic aneurysm and intracerebral hemorrhage) | 0.032                                         | (0.029-0.035)                      | 1.03 | (0.87-1.23)                   | 0.99 | (0.82-1.18)                                   | 0.032                                          | (0.029-0.035) | 0.76                          | (0.54-0.98)†† | 0.92 | (0.66-1.17)   |
| Respiratory cancer                                                                     | 0.051                                         | (0.047-0.055)                      | 0.93 | (0.81-1.07)                   | 0.98 | (0.85-1.13)                                   | 0.060                                          | (0.056-0.065) | 1.13                          | (0.92-1.33)   | 1.10 | (0.89-1.32)   |
| Hip fracture                                                                           | 0.073                                         | (0.068-0.078)                      | 1.12 | (1.01-1.25)                   | 1.10 | (0.98-1.23)                                   | 0.105                                          | (0.094-0.115) | 1.07                          | (0.92-1.22)   | 1.05 | (0.90-1.20)   |
| <b>Ambulatory care sensitive conditions</b>                                            |                                               |                                    |      |                               |      |                                               |                                                |               |                               |               |      |               |
| Chronic obstructive pulmonary disease                                                  | 0.13                                          | (0.12-0.15)                        | 0.85 | (0.78-0.93)††                 | 0.84 | (0.77-0.93)††                                 | 0.24                                           | (0.21-0.26)   | 0.94                          | (0.84-1.03)   | 0.98 | (0.88-1.09)   |
| Congestive heart failure                                                               | 0.16                                          | (0.15-0.18)                        | 0.93 | (0.86-1.01)                   | 0.88 | (0.81-0.96)††                                 | 0.20                                           | (0.18-0.22)   | 0.95                          | (0.85-1.05)   | 1.12 | (1.00-1.24)   |
| <b>Cardiac procedures</b>                                                              |                                               |                                    |      |                               |      |                                               |                                                |               |                               |               |      |               |
| <b>Coronary artery bypass graft</b>                                                    |                                               |                                    |      |                               |      |                                               |                                                |               |                               |               |      |               |
| Urgent, semi-urgent                                                                    | 0.029                                         | (0.026-0.031)                      | 1.06 | (0.90-1.24)                   | 1.41 | (1.20-1.67)††                                 | 0.039                                          | (0.035-0.043) | 0.93                          | (0.73-1.13)   | 0.77 | (0.59-0.95)†† |
| Elective                                                                               | 0.046                                         | (0.041-0.051)                      | 0.48 | (0.39-0.59)††                 | 0.49 | (0.39-0.62)††                                 | 0.040                                          | (0.037-0.043) | 0.68                          | (0.45-0.92)†† | 0.51 | (0.30-0.72)   |

|                                    |       |               |      |               |      |               |       |               |      |               |      |               |
|------------------------------------|-------|---------------|------|---------------|------|---------------|-------|---------------|------|---------------|------|---------------|
| Percutaneous coronary intervention |       |               |      |               |      |               |       |               |      |               |      |               |
| Urgent, semi-urgent                | 0.057 | (0.052-0.061) | 0.83 | (0.72-0.94)†† | 0.87 | (0.76-1.00)   | 0.094 | (0.08-0.11)   | 1.03 | (0.88-1.18)   | 0.96 | (0.82-1.10)   |
| Elective                           | 0.061 | (0.055-0.067) | 0.34 | (0.27-0.43)†† | 0.39 | (0.31-0.50)†† | 0.037 | (0.03-0.04)   | 0.35 | (0.21-0.49)†† | 0.29 | (0.16-0.42)†† |
| Emergency department visits        |       |               |      |               |      |               |       |               |      |               |      |               |
| Low acuity                         | 11.42 | (10.28-12.57) | 0.86 | (0.81-0.91)†† | 0.86 | (0.81-0.91)†† | 32.10 | (29.17-35.02) | 0.97 | (0.92-1.03)   | 0.98 | (0.92-1.05)   |
| Medium acuity                      | 10.25 | (9.46-11.04)  | 0.88 | (0.82-0.93)†† | 0.86 | (0.80-0.93)†† | 10.98 | (10.16-11.79) | 0.78 | (0.73-0.84)†† | 0.81 | (0.75-0.87)†† |
| High acuity                        | 2.45  | (2.27-2.63)   | 0.63 | (0.82-0.93)†† | 0.55 | (0.50-0.60)†† | 2.08  | (1.92-2.24)   | 0.87 | (0.79-0.97)†† | 0.94 | (0.85-1.05)   |

Note: CI = confidence interval.

\*Adjusted for age group, sex, pre- and post-restriction calendar month, and annual trend.

†Mar. 15 to May 14, 2003.

‡May 15 to July 14, 2003.

§Admissions with no operative procedures.

¶†Top 20 urgent procedures by volume: appendectomy; cholecystectomy; femur fixation; hip arthroplasty; colectomy; ankle fixation; hip fixation; tibia or fibula fixation; hernia fixation; radius or ulna fixation; cesarean section; duodenectomy; humerus fixation; ectopic pregnancy removal; laparoscopy; intracranial decompression; radius or ulna reduction; elbow joint fixation; hysterectomy; partial prostatectomy.

\*\*Top 20 elective procedures by volume: total hysterectomy; hernia fixation; cesarean section; knee arthroplasty; hip arthroplasty; partial prostatectomy; colectomy; cholecystectomy; tonsillectomy or adenoidectomy; partial hysterectomy; reduction mammoplasty; lumpectomy; radical prostatectomy; spinal fusion; fixation of bladder neck; salpingo oophorectomy; vaginal fixation; thyroidectomy; cystectomy; radical mastectomy.

††Clinically (> 5%) and statistically ( $p < 0.05$ ) significant change in utilization rate.
